# Supplementary material
Source: PubMed Central journal article supplement (PMC549439)

VC

SC

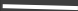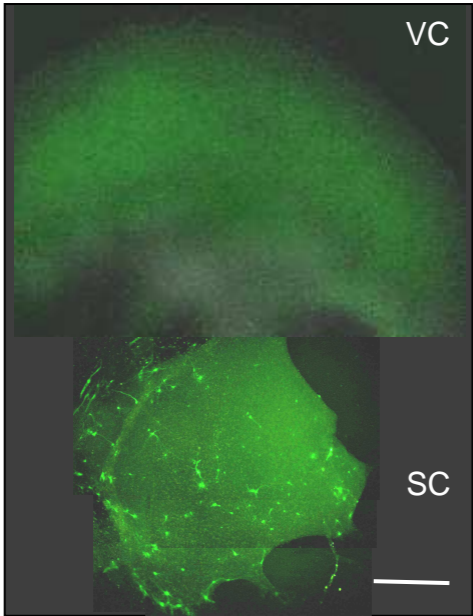

Supplement: pnas_102_8_3064__1.pdf [file pnas_102_8_3064__1.pdf]
